# Supplementary material for: Bacteria Getting into Shape: Genetic Determinants of E. coli Morphology
Source: PubMed Central journal article supplement (PMC5340871; doi:10.1128/mbio.01977-16), 2017-03-07

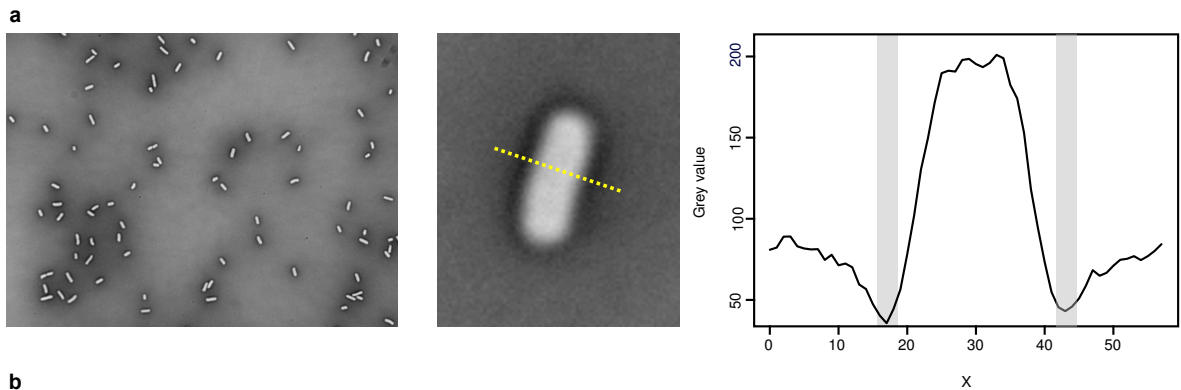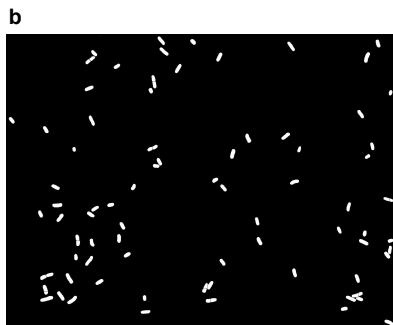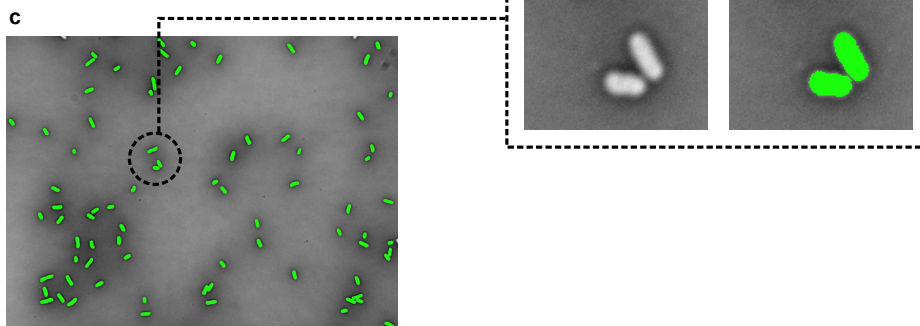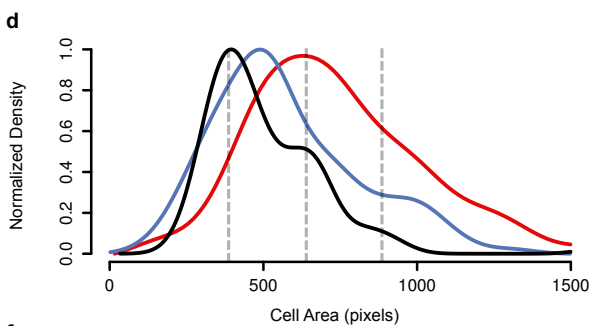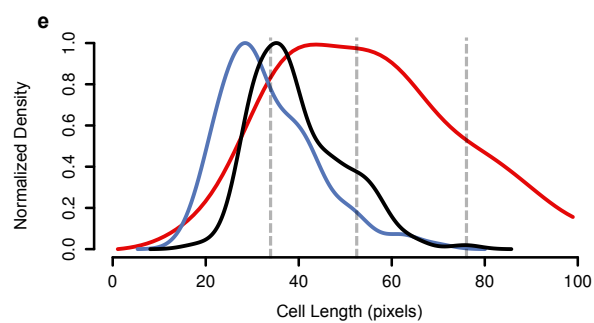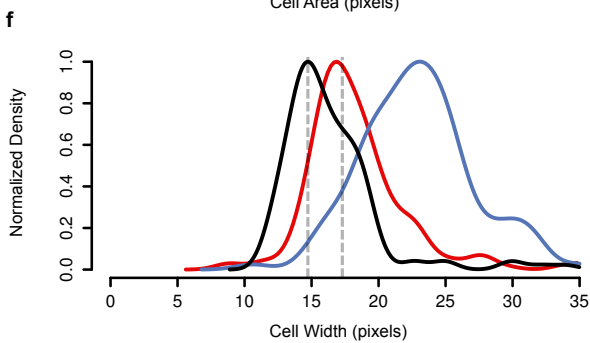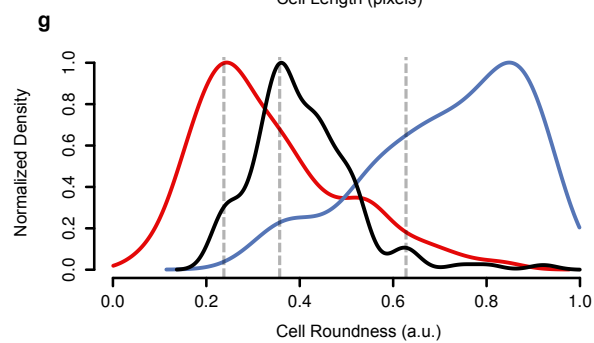

Supplement: mbo001173215sf1.pdf [file mbo001173215sf1.pdf]
